1 **Title:** Precise Transcript Reconstruction with End-Guided Assembly

2 **Running title:** End-Guided Assembly with Bookend

3

4 **Authors:** Michael A. Schon<sup>1,2,\*</sup>, Stefan Lutzmayer<sup>1</sup>, Falko Hofmann<sup>1</sup> & Michael D. Nodine<sup>1,2,\*</sup>

5

6 **Affiliations:** <sup>1</sup>Gregor Mendel Institute (GMI), Austrian Academy of Sciences, Vienna Biocenter

7 (VBC), Dr. Bohr-Gasse 3, 1030 Vienna, Austria; <sup>2</sup>Laboratory of Molecular Biology, Wageningen

8 University, Wageningen, 6708 PB, the Netherlands; \*Correspondence

9

10 **Correspondence:** michael.nodine@wur.nl and michael.schon@wur.nl

11

12 **Key words:** RNA-seq, transcriptome, single-cell, TSS, PAS, capping, polyadenylation, 5' and 3'

13 ends, long-read, Iso-Seq

14

15 **Summary statement:**

16 Bookend is a generalized framework that utilizes RNA 5' and 3' end information hidden in RNA-  
17 seq datasets to accurately reconstruct transcriptomes including those from single cells.

18

19

20 **ABSTRACT**

21 Accurate annotation of transcript isoforms is crucial to understand gene functions, but automated  
22 methods for reconstructing full-length transcripts from RNA sequencing (RNA-seq) data remain  
23 imprecise. We developed Bookend, a software package for transcript assembly that incorporates  
24 data from different RNA-seq techniques, with a focus on identifying and utilizing RNA 5' and 3'  
25 ends. Through end-guided assembly with Bookend we demonstrate that correct modeling of  
26 transcript start and end sites is essential for precise transcript assembly. Furthermore, we  
27 discovered that utilization of end-labeled reads present in full-length single-cell RNA-seq (scRNA-  
28 seq) datasets dramatically improves the precision of transcript assembly in single cells. Finally,  
29 we show that hybrid assembly across short-read, long-read, and end-capture RNA-seq datasets  
30 from Arabidopsis, as well as meta-assembly of RNA-seq from single mouse embryonic stem cells  
31 (mESCs) can produce end-to-end transcript annotations of comparable quality to reference  
32 annotations in these model organisms.

## 33 INTRODUCTION

34 The functions of genes depend on the amount and types of RNA molecules that they produce.  
35 Variation in transcript initiation, splicing and polyadenylation can generate an array of RNA  
36 isoforms, and cataloging how these RNA variants change across development and disease  
37 provides insights into corresponding gene functions<sup>1-3</sup>. Large-scale projects dedicated to the  
38 manual curation of gene annotations are extremely valuable, but are labor-intensive and thus  
39 limited in scope to the most well-studied organisms<sup>4-7</sup>. Moreover, multicellular organisms have  
40 difficult-to-access cell types that will inevitably be overlooked by even the most comprehensive  
41 annotation projects<sup>8</sup>. The completeness and accuracy of a reference annotation can considerably  
42 impact all downstream data analyses, from gene expression to predictions of gene function<sup>9-11</sup>.  
43 To understand how transcriptome architecture varies during development and in response to  
44 disease, it is therefore valuable to have an automated method that accurately identifies transcript  
45 isoforms. Accordingly, many computational tools have been developed for genome annotation  
46 including software that utilizes the massive and growing diversity of RNA sequencing (RNA-seq)  
47 technologies<sup>12</sup>.

48 A wide array of RNA-seq protocols have been developed to profile different aspects of the  
49 transcriptome, from strand-specific coverage of gene bodies<sup>13</sup> to selective amplification of RNA  
50 5' ends<sup>14-17</sup>, 3' ends<sup>18,19</sup> or simultaneous capture of both ends<sup>20,21</sup>. Major recent advances have  
51 enabled the amplification of full-length transcripts from single cells<sup>22,23</sup> or 3' end capture from  
52 millions of cells<sup>24-26</sup>. In parallel, advances have been made for profiling RNA on "third-generation"  
53 long-read sequencing platforms such as PacBio and Oxford Nanopore single-molecule  
54 sequencers that can read a continuous DNA and/or RNA molecule many times the length of a  
55 typical transcript and yield end-to-end complete sequences of RNA molecules<sup>27,28</sup>.

56 Transcript assembly is the effort to distill information from RNA-seq experiments into a  
57 comprehensive annotation of the transcript isoforms present in the corresponding samples.  
58 Depending on the method, RNA-seq reads contain a broad spectrum of information content. At

59 one extreme, single-end reads from a non-stranded RNA-seq protocol can be 50 nucleotides (nt)  
60 or shorter and sequenced from one end of a double-stranded cDNA fragment such that the  
61 resulting sequence is a random substring of an RNA molecule or its reverse complement. Paired-  
62 end reads contain two ends of a cDNA molecule and typically there is a gap of unknown length  
63 between the mate pairs. When aligned to a reference genome, paired reads may span more than  
64 one splice junction, indicating that these splicing events occurred in the same molecule. Some  
65 strand-specific RNA-seq protocols selectively sequence only first-strand or second-strand cDNA  
66 to preserve knowledge of the original mRNA molecule's orientation<sup>13</sup>. Other protocols selectively  
67 capture and sequence a fragment immediately downstream of the RNA 5' end or upstream of the  
68 3' end, demarcating precisely where that molecule begins or ends, respectively. Finally, the most  
69 information-rich reads come from long-read sequencing, in which the RNA or cDNA is read in its  
70 entirety without fragmentation. Long-read methods are a promising tool for transcript annotation,  
71 but current protocols are more error-prone per base sequenced, less sensitive, and more costly  
72 than comparable short-read experiments. Because the vast majority of existing RNA-seq data is  
73 in short-read format, nearly all assemblers have aimed to reconstruct transcripts from paired-end  
74 short reads. A long-recognized problem of assemblers is the inaccurate annotation of transcript  
75 start sites (TSS) and polyadenylation sites (PAS)<sup>29,30</sup>. Existing short-read assemblers infer TSSs  
76 and PASs at sharp changes in read coverage, but such changes can also be due to alignment  
77 errors, biased RNA fragmentation, sample degradation, or spurious intron retention. Long-read  
78 sequencing methods are designed to read RNA from TSS to PAS, but they remain susceptible to  
79 a variety of experimental artifacts<sup>30</sup>. The increasing adoption of long reads for transcript  
80 annotation has led to a separate suite of tools that summarize, collapse, or "polish" long reads to  
81 remove erroneous structures and present a set of representative isoforms from these reads<sup>31,32</sup>.  
82 For example, a recently developed transcript assembler reports the use of long reads in assembly  
83 by removing aligned segments with a high error rate and assembling the resulting gapped reads<sup>33</sup>.  
84 Transcript annotation would ideally integrate information from a variety of RNA-seq methods to

85 determine the best evidence for transcript starts, ends and splicing patterns in a tissue-of-interest.  
86 However, current transcriptome assembly methods do not employ information about where RNAs  
87 begin and end. Here, we describe a method utilizing RNA 5' and 3' end information contained in  
88 RNA-seq datasets to accurately reconstruct transcriptomes including those from single cells.

89

## 90 **RESULTS**

### 91 *A framework for end-guided transcript assembly*

92 To determine whether RNA 5' and 3' end information can improve transcript assembly algorithms,  
93 we developed a generalized framework for identifying RNA ends in sequencing data and using  
94 this information to assemble transcript isoforms as paths through a network accounting for splice  
95 sites, transcription start sites (TSS) and polyadenylation sites (PAS). Because this software uses  
96 end information to guide transcript assembly, we named it Bookend. Importantly, Bookend takes  
97 RNA-seq reads from any method as input and after alignment to a reference genome, reads are  
98 stored in a lightweight end-labeled read (ELR) file format that records all RNA boundary features  
99 (5' labels, splice donors, splice acceptors, gaps, 3' labels), as well as the sample of origin for that  
100 read (see Supporting Notes). Assembly is then resolved at each locus with aligned reads through  
101 a four-step procedure (Fig1; see Methods and Supporting Notes). First, boundary labels from all  
102 aligned RNA-seq reads are clustered and filtered to demarcate a unique set of locus TSSs, PASs  
103 and splice junctions. Each locus is partitioned into a set of nonoverlapping "frags" defined as the  
104 spans between adjacent boundary labels. Four additional frags (S+, E+, S-, E-) denote the  
105 presence of a Start or End Tag on the forward or reverse strand. Second, a Membership Matrix  
106 is generated to redefine all aligned reads with respect to the locus frags. A read's Membership  
107 includes each frag it overlaps and excludes each incompatible frag (e.g. a spanned intron, a  
108 region upstream of a TSS or downstream of a PAS). Reads with identical patterns of Membership  
109 are condensed to a single element (row) of the Membership Matrix, whose weight is the total  
110 coverage depth across the element by all reads of that pattern. Third, an Overlap Graph is

111 constructed from the Membership Matrix elements and this directed graph is simplified by  
 112 collapsing shorter elements into the elements that contain them. Finally, the Overlap Graph is  
 113 iteratively traversed to resolve an optimal set of Greedy Paths from TSSs to PASs. These Paths  
 114 describe a set of full-length transcript models best supported by the input reads. The Membership  
 115 Matrix definition is flexible enough to utilize reads regardless of their length, alignment gaps,  
 116 strand, or end information (FigS1B).  
 117

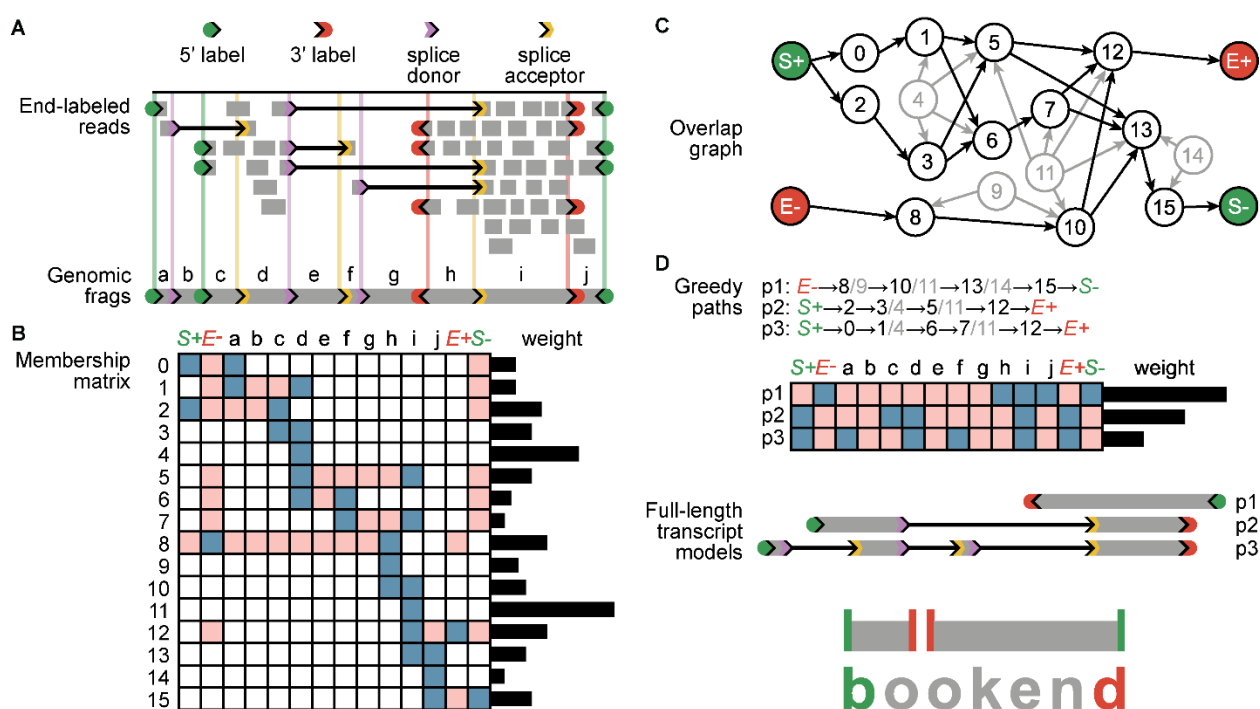

118  
 119 **Figure 1.** End-guided assembly with Bookend  
 120 **(A)** Individual RNA-seq reads are mapped to a genome, recording which reads mark a transcript 5'  
 121 or 3' end, and which reads span one or more splice junctions. Ranges between adjacent features  
 122 are recorded as frags. **(B)** Each unique read structure is recorded in a condensed representation  
 123 as one element in a Membership Matrix; blue- included, pink- excluded. The weight of each element  
 124 is the coverage depth of matching reads (sequenced bases/length) across the element. **(C)** A  
 125 directed graph is constructed between overlapping elements of the Membership matrix. Weights of  
 126 contained elements (gray) are distributed proportionally to their containers. **(D)** A set of optimal  
 127 paths through the graph is iteratively constructed from the heaviest unassigned elements.  
 128 Complete Paths are output as full-length transcript annotations.  
 129

130 *End-labeled reads improve the quality of transcript assembly*

131 Arabidopsis is an ideal model to benchmark transcript assembly in higher eukaryotes. The  
132 Arabidopsis genome is compact (~119 megabases), contains few repetitive elements, and the  
133 TAIR10 reference annotation was extensively curated from expressed sequence tag (EST) data<sup>7</sup>.  
134 To determine whether assembly benefits from end-labeled reads, we examined libraries  
135 generated with the low-input sequencing method Smart-seq2 from Arabidopsis floral buds<sup>16</sup>. Two  
136 crucial steps in the Smart-seq2 protocol, template switching and preamplification, enrich for full-  
137 length cDNA with an oligo label at both the 5' (template switching oligo, TSO) and 3' (oligo-dT)  
138 end<sup>22</sup>. These oligos were trimmed from all reads and a record was kept of which end label was  
139 found (5', 3', or no label) before mapping to the genome. As anticipated, a small percentage of  
140 reads were found with either label (Fig 2A; Supplemental Table 1). All reads were aligned to the  
141 Arabidopsis genome, and the terminal positions of 5'- and 3'-labeled reads were retained as "Start  
142 Tags" and "End Tags", respectively. Of End Tags mapping to annotated genes, 88% mapped  
143 near PASs, defined as the last decile of the gene or up to 100nt downstream (Fig2B). Start Tags  
144 had lower specificity for TSSs, with only 48% of Start Tags in the first decile of genes or up to  
145 100nt upstream. Template switching is known to readily occur at RNA 5' ends derived from in vivo  
146 or in vitro RNA decay. However, a subset of reads contain an intervening G between the TSO  
147 and the genome-aligned sequence, indicating a 7-methylguanosine cap on the template  
148 RNA<sup>16,34,35</sup>. The upstream untemplated G (uuG)-containing Start Tags were classified as Cap  
149 Tags. Cap Tags were rare relative to all Start Tags (9%), but were much more specific to TSSs  
150 with an average of 88% of Cap Tags within each gene mapping near the 5' end (Fig2B). To  
151 optimize detection of true transcript 5' and 3' ends, the Tag Clustering algorithm designed for  
152 Bookend defines Tag weight as a function of total read depth and applies a bonus to Cap Tags  
153 over non-uuG Start Tags (See Supplemental Note: "Tag Clustering").

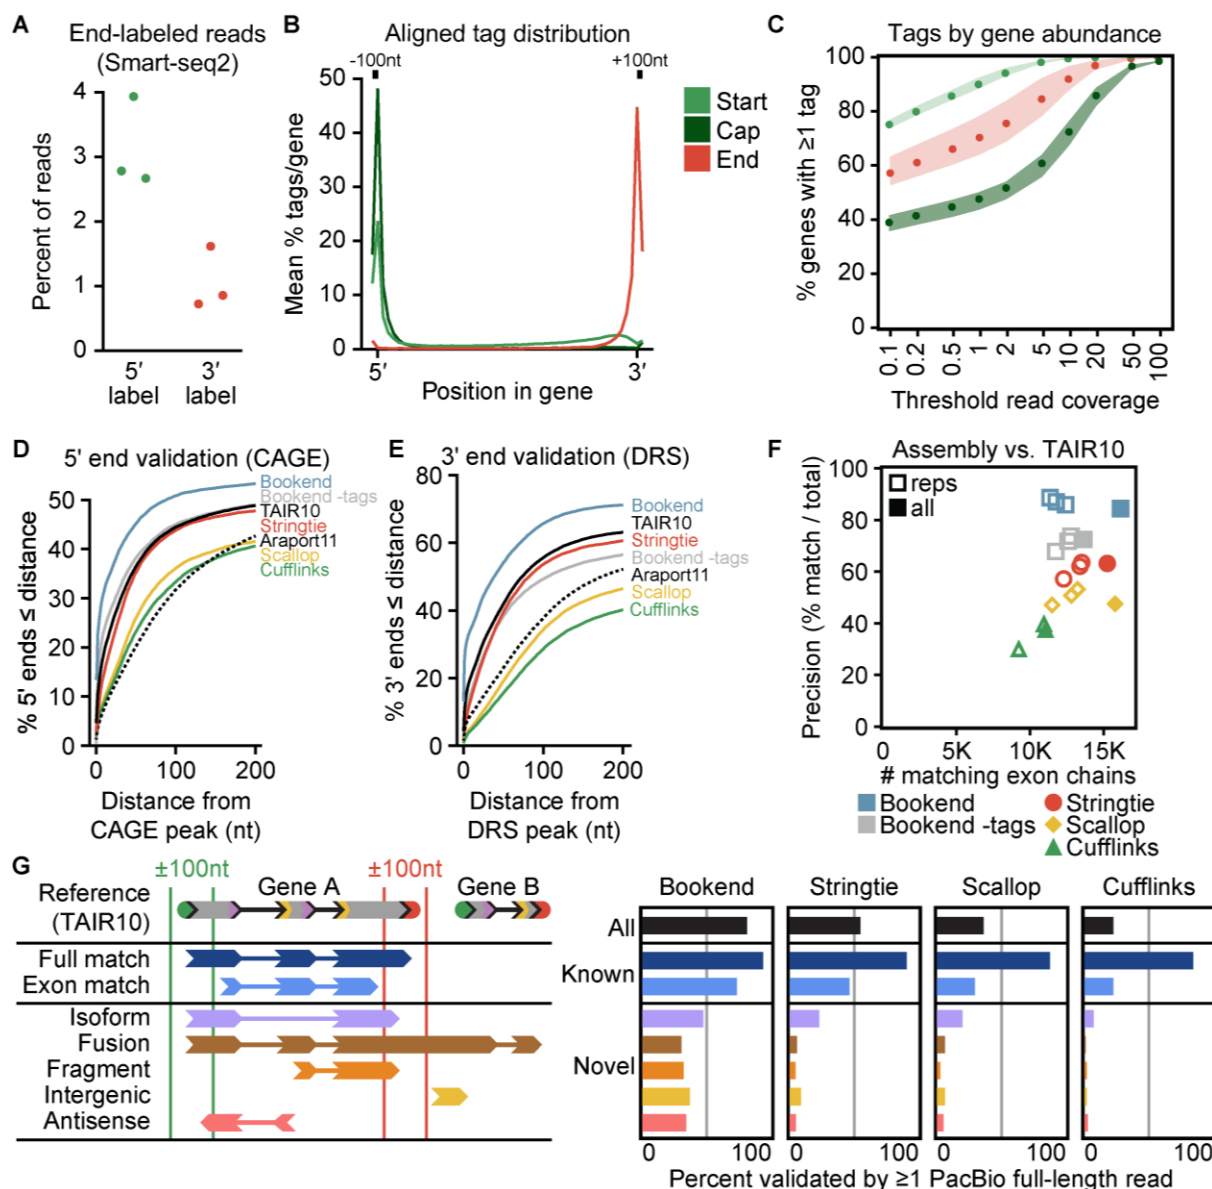

154

155 **Figure 2.** End-labeled Smart-seq2 reads accurately detect transcript 5' and 3' ends.  
 156 **(A)** Percent of reads in three Smart-seq2 libraries that contained a 5'-labeled or 3'-labeled junction,  
 157 respectively. **(B)** Average signal strength per gene of Start, End, and Cap Tags along gene bodies in  
 158 50 bins with an additional 100nt flanking each gene boundary. Start Tag, any 5' label; Cap Tag, 5' label  
 159 with upstream untemplated G (uuG); End Tag, 3' label. **(C)** Likelihood of a gene to possess  $\geq 1$  Start,  
 160 Cap, or End Tag as a function of aligned read coverage (average read depth/base). **(D)** Cumulative  
 161 frequency of annotated 5' ends as a function of distance from the closest CAGE peak<sup>36</sup>. **(E)** Distance  
 162 of 3' ends from the nearest DRS peak<sup>37</sup> as in (D). **(F)** Performance of three transcript assemblers,  
 163 measured by total number of reference-matching exon chains (x-axis) vs. percent of assembled  
 164 transcripts that match the reference (y-axis). **(G)** (Left) Schematic depicting classifications of assembled  
 165 transcripts against the closest TAIR10 reference isoform. (Right) Rate of validation by PacBio full-length  
 166 non-chimeric (FLNC) reads for different assemblies, grouped by classification.  
 167



168 Despite end-labeled reads being relatively rare, the preamplification process should ensure  
169 that a TSO or oligo-dT sequence is at each end of every cDNA molecule prior to tagmentation.  
170 Therefore, we expected end-labeled reads to be distributed widely across the genome wherever  
171 reads exist. As predicted, the majority of genes with >0 read coverage contained  $\geq 1$  Start Tag  
172 and  $\geq 1$  End Tag, and the likelihood of finding a Start or End Tag increased as a function of total  
173 read coverage (Fig2C). Of all genes with at least 1x, 10x and 100x read coverage, 73.3%, 94.4%  
174 and 99.2% possessed both a Start and End Tag, respectively.

175 To assess whether end-labeled reads mark real TSSs and PASs at nucleotide precision,  
176 Bookend was used to assemble all floral bud Smart-seq2 reads either with or without utilizing  
177 Start and End Tags. Additionally, three leading short-read transcript assemblers were used with  
178 comparable settings (see Methods): StringTie2<sup>33,38</sup>, Scallop<sup>39</sup>, and Cufflinks<sup>40</sup>. Publicly available  
179 Arabidopsis CAGE<sup>36</sup> and Direct RNA-seq (DRS<sup>37</sup>) datasets were used to validate 5' and 3' ends,  
180 respectively. All three of these widely-used assemblers output thousands of single-exon  
181 unstranded fragments, which were ambiguous with regard to which end is 5' or 3' and thus were  
182 discarded from further analyses (Supplemental Table 2). Bookend-defined TSSs based on  
183 Start/Cap Tags were more likely to have a CAGE peak within 200nt than 5' ends reported either  
184 by Bookend without the use of Start Tags, the three leading assemblers, or even the current  
185 Arabidopsis reference annotations (Fig2D). Likewise, a higher proportion of Bookend-identified  
186 PASs were supported by DRS reads than PASs reported by the other transcript assemblers and  
187 Arabidopsis reference annotations (Fig2E). At the nucleotide level, Bookend-defined transcript  
188 boundaries were more than twice as likely to agree with the exact experimentally-determined TSS  
189 and PAS peak positions than the most accurate reference annotation (TAIR10), while the other  
190 three assemblers reported transcript boundaries less accurate than TAIR10 (FigS2A-B).  
191 Strikingly, even the Bookend 5' and 3' ends >100nt from any reference still possessed known  
192 sequence motifs associated with TSS and PAS, respectively, whereas sequence content around  
193 novel ends from Cufflinks, Scallop, and StringTie2 is largely incoherent (FigS2C-D). In addition to

194 a dramatic increase in transcript boundary accuracy, 16,158 exon chains predicted by Bookend  
195 fully matched a TAIR10 reference transcript, which was higher than when end-labeled reads were  
196 ignored (13,660) and exceeded the totals from Scallop (15,785), StringTie2 (15,253) or Cufflinks  
197 (11,051) (Fig2F). Therefore, Bookend correctly builds more known transcripts than other  
198 assemblers and Bookend-annotated 5' and 3' ends were more precise than even the most  
199 accurate Arabidopsis reference annotation.

200 In addition to known transcripts, Bookend constructed 2,979 isoforms not present in TAIR10,  
201 which was 66% fewer than StringTie2 (8,886), 83% fewer than Scallop (17,400), and 84% fewer  
202 than Cufflinks (18,934). An assembled transcript may fail to match TAIR10 either because the  
203 assembly is incorrect or because the reference is incomplete. To distinguish between these  
204 possibilities, two long-read SMRT cells of floral bud RNA were sequenced with the PacBio  
205 platform to yield 547,910 full-length non-chimeric (FLNC) reads. All short-read assemblies were  
206 partitioned into 7 different classifications based on their relationship to the most similar TAIR10  
207 model (Fig2G). A transcript model was considered experimentally validated if at least one aligned  
208 PacBio read fully matched the model (entire exon chain,  $\pm 100$ nt ends). Of all Bookend transcripts,  
209 81.2% were supported by PacBio data, which surpassed the validation of transcripts predicted by  
210 StringTie2 (54.7%), Scallop (35.9%) or Cufflinks (22.3%) (Fig2G; Supplemental Table 2).  
211 Reference-matching transcripts have a higher average estimated abundance than non-reference  
212 transcripts, making the latter more difficult to validate with the limited throughput of long-read  
213 sequencing (FigS2E). Despite this limitation, 42.3% of non-reference Bookend assemblies were  
214 fully supported by at least one PacBio read, which was substantially higher than the validation  
215 rate of non-reference transcript assemblies generated by StringTie2 (15.9%), Scallop (11.6%),  
216 and Cufflinks (4.3%) (Fig. 2G). Taken together, these results demonstrate that end-guided  
217 assembly using latent RNA end information enables precise transcript reconstruction from short-  
218 read datasets.

219 *Hybrid assembly refines and complements long-read RNA-seq*

220 Long-read sequencing technologies do not obviate the need for transcript reconstruction. Various  
221 sources of technical and biological noise result in fragmented or improperly spliced long reads<sup>30,41</sup>.  
222 Long-read approaches also suffer from a higher base-level error rate compared to short-read  
223 platforms<sup>42</sup>. Error correcting methods such as Circular Consensus Sequencing (CCS) require  
224 reverse transcription and cDNA amplification, which are susceptible to mispriming and template-  
225 switching artifacts<sup>43,44</sup>. This has driven the ongoing development of tools to refine transcript  
226 models derived from long reads<sup>31,32</sup>. Additionally, StringTie2 was recently repurposed to assemble  
227 long reads<sup>33</sup>.

228 To quantify potential sources of error, PacBio FLNC reads were aligned to the genome and  
229 processed by the Bookend pipeline to identify and remove template-switching artifacts, oligo-d(T)  
230 mispriming events at A-rich regions, and exons with a high alignment error (Fig3A). Across both  
231 SMRT cells, 95.4% of reads aligned successfully, and 97.0% of alignments did not contain any  
232 high-error exons, defined as the total length of mismatches, inserts, and deletions exceeding 10%  
233 of the exon length. However, 14.1% of all FLNC 3' end labels were removed due to alignment  
234 failure or the presence of an A-rich region immediately downstream of the oligo-d(T) junction. If  
235 treated as genuine 3' ends, these reads can cause false annotation of 3'-UTRs or putative  
236 transcripts antisense or intergenic to known genes<sup>43</sup> (FigS3A). Direct RNA sequencing bypasses  
237 oligo-d(T) priming and was used to produce a map of genuine Arabidopsis PAS<sup>37</sup>. These sites  
238 show a distinct pattern of nucleotide enrichment, including a C/A dinucleotide motif at the  
239 cleavage and polyadenylation site itself, and a U-rich upstream element (USE) and downstream  
240 element (DSE) (Fig3B). Three tools were used to reduce the PacBio FLNC data into a unique set  
241 of transcripts: the Iso-seq3 clustering algorithm from PacBio, assembly by StringTie2, and end-  
242 guided assembly by Bookend. All 3 methods could recapitulate known PAS motifs at the set of 3'  
243 ends within 100nt of a TAIR10-annotated PAS. In contrast to Bookend, StringTie2-annotated 3'  
244 ends showed a slight A-richness at novel 3' ends, and both Iso-seq3 and StringTie2 annotations

245 contain thousands of putative novel antisense or intergenic RNAs whose 3' ends are extremely  
 246 A-rich (Fig3C). Therefore, Bookend retains genuine novel PAS by filtering against known 3'  
 247 artifacts.

248

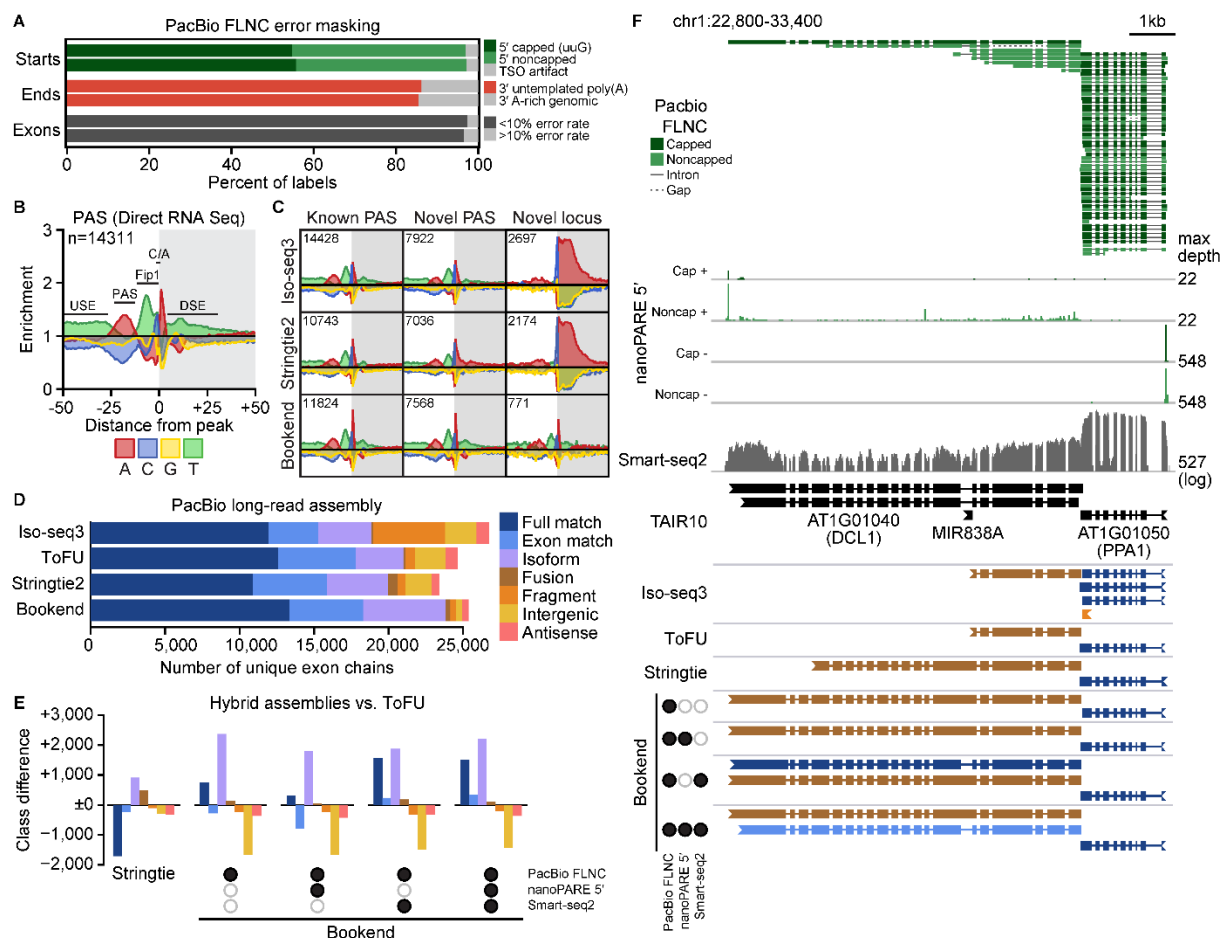

249

250 **Figure 3. Long-read sequencing is augmented by hybrid assembly**  
 251 **(A)** Artifacts identified in PacBio FLNC reads from two SMRT cells by alignment to the Arabidopsis  
 252 reference genome. **(B)** Nucleotide frequency enrichment in a  $\pm 50$ nt window around poly(A) sites  
 253 (PAS) identified by Direct RNA Seq<sup>37</sup>. **(C)** Nucleotide enrichment around 3' ends of transcripts  
 254 constructed from PacBio reads by Iso-seq3 (top), StringTie2 (middle), and Bookend (bottom) at  
 255 sites overlapping a TAIR10 PAS (left), novel PAS at a known gene (middle), and novel antisense  
 256 or intergenic loci (right); colors and scales as in **B**. **(D)** Classification against TAIR10 of transcripts  
 257 constructed by four long-read strategies: Iso-seq3 clustering, cluster collapse by ToFU, and FLNC  
 258 assembly by StringTie2 and Bookend. **(E)** Effect of long-read assembly on the number of transcripts  
 259 by class (colored as in **D**) by StringTie2 (left) or hybrid assembly with one or more tissue-matched  
 260 sequencing libraries by Bookend (right). Bars show difference vs. ToFU-collapsed Iso-seq3  
 261 clusters. **(F)** Integrative Genomics Viewer (IGV) image of the Arabidopsis *DICER-LIKE1* (*DCL1*)  
 262 locus. From top to bottom: PacBio reads colored by 5' end label, nanoPARE capped and  
 263 noncapped read 5' end frequency, Smart-seq2 read coverage, TAIR10 reference models, and long-  
 264 read assemblies colored by classification vs. TAIR10 as in **D**.

265

266 Another major source of transcript assembly error is truncated 5' ends due to premature  
267 template switching during reverse transcription or amplification of degraded RNA. Although 50%  
268 of FLNC alignments matched a full-length TAIR10 transcript, most were copies of a few highly-  
269 expressed genes. After collapsing alignments into sets of unique exon chains, full-length  
270 reference transcripts accounted for only 18% of all unique chains, and 25% of unique chains were  
271 fragments of known TAIR10 transcripts missing one or more exons (Supplemental Table 3).  
272 Clustering by Iso-seq3 removes some fragments, and they can be further reduced after alignment  
273 by collapsing 5' truncations with Transcript isoforms: Full-length and Unassembled (ToFU)<sup>45</sup>  
274 (Fig3D). However, it was unknown whether an assembly algorithm would further improve the  
275 quality of long-read annotations. Surprisingly, passing the FLNC data through StringTie2 yielded  
276 1,704 fewer full-length reference matches compared to ToFU, and the number of transcripts  
277 classified as fusions of two different genes increased nearly four-fold (Fig3D-E). Because the  
278 Arabidopsis genome is compact with an average of only 1.5 kilobases (kb) between adjacent  
279 genes, assembly algorithms agnostic to 5' and 3' end information risk mis-annotating fused genes  
280 due to spurious read-through transcripts (FigS3A). By contrast, end-guided assembly of PacBio  
281 FLNCs with Bookend yielded 761 more full-length reference matches than ToFU, fewer than half  
282 as many fusions as StringTie2, and over a thousand more putative novel isoforms than both  
283 (Fig3D, Table S3).

284 Bookend's assembly model is general enough to mix reads from different sequencing  
285 strategies. Therefore, we generated "hybrid assemblies" from combinations of PacBio FLNCs with  
286 Smart-seq2 and/or nanoPARE (a 5' end sequencing strategy) from floral bud RNA<sup>16</sup>. All hybrid  
287 assemblies had higher precision than assembling long reads alone, and up to 809 more full-length  
288 matches could be identified (Fig3E, FigS3C, Supplemental Table 3). For example, *DICER-LIKE1*  
289 (*DCL1*) encodes the Arabidopsis *Dicer* homolog required for microRNA biogenesis, and its mRNA  
290 is maintained at low cellular abundance through an autoregulatory negative feedback loop

291 involving two microRNAs, miR162 and miR838, the latter of which is encoded in intron 14 of its  
292 own gene<sup>46,47</sup>. Long reads alone were not sufficient to define the canonical 6.2 kilobase *DCL1*  
293 transcript because 7 of 8 PacBio reads mapping to *DCL1* were non-capped truncations, and intron  
294 14 was retained in the only full-length read (Fig3F). By synthesizing information from multiple  
295 modes of sequencing, hybrid assembly with Bookend built a more complete transcript catalog  
296 that includes both the fully-spliced isoform and the isoform that retains MIR838. As a final  
297 refinement, a hybrid assembly that requires the presence of Cap Tags at transcript 5' ends yielded  
298 a transcriptome with a 74.6% global concordance with the TAIR10 annotation. We report this  
299 hybrid assembly of long, short and 5' end reads as the Bookend Floral Bud annotation  
300 (Supplemental Dataset 1-2).

301  
302 *Transcript discovery from single-cell sequencing*  
303 Bookend achieved comparable precision assembling Arabidopsis transcriptomes from either long  
304 reads or short reads generated by Smart-seq2, which is a protocol routinely used for single-cell  
305 RNA sequencing (scRNA-seq) (FigS3C). However, scRNA-seq poses multiple hurdles to  
306 accurate assembly. Amplifying the few picograms of RNA in a single cell exacerbates biases and  
307 artifacts during reverse transcription<sup>22</sup>, and dropouts from inefficient RNA capture place limits on  
308 accurate isoform quantification from scRNA-seq<sup>48</sup>. Additionally, scRNA-seq has been most widely  
309 adopted in the study of mammalian systems. The mouse genome (and likewise the human  
310 genome) is roughly 30 times larger than the Arabidopsis genome with an average of twice as  
311 many introns per gene and nearly three times the number of annotated isoforms. Additionally,  
312 mouse introns can exceed 100kb and are on average 36 times longer than in Arabidopsis. Many  
313 isoforms per gene and large spans of non-genic sequence make it considerably more challenging  
314 both to assemble transcripts and to validate which assemblies are correct. To evaluate Bookend's  
315 utility on mammalian scRNA-seq data, we tested it on a dataset designed for single-cell  
316 benchmarking<sup>49</sup> which contains a set of synthetic Spike-In RNA Variants (SIRVs) added prior to

317 cell lysis. SIRVs were designed to present a challenge to isoform quantification tools by mimicking  
318 complex mammalian genes<sup>50</sup>. The 69 synthetic transcripts map to 7 regions on a hypothetical  
319 genome in a way that recapitulates canonical and non-canonical splicing variation, antisense  
320 transcription and alternative 5' and 3' ends with up to 18 isoforms per gene (Fig S4A). SIRV Mix  
321 E2 contains molecules in four discrete concentrations so that each locus has major and minor  
322 isoforms that vary in relative abundance by up to 128-fold. SMARTer library preparations from 96  
323 single mouse embryonic stem cells (mESCs) were deeply sequenced, with an average of 7 million  
324 aligned paired-end 100bp reads per cell (Supplemental Table 4) including an average of just over  
325 500,000 SIRV-mapping reads per cell. Bookend correctly reconstructed (full splice match and  
326  $\leq 100$ nt error on both ends) an average of 22.6 transcripts per cell, which was higher than either  
327 Scallop (16.3) or StringTie2 (13) (Fig5AB). Moreover, Bookend assembled fewer false SIRVs than  
328 StringTie2 and especially Scallop (Fig5B). To test a relationship between performance and  
329 sequencing depth, cells were progressively combined into pairs, then sets of 4, 16, 32, and a full  
330 merge of reads from all 96 cells. The relative performance of the three assemblers was stable  
331 over two orders of magnitude of input with the F-measure (harmonic mean of precision and recall)  
332 slightly rising for Bookend as the sequencing depth increased and slightly decreasing for the  
333 others (Fig5B). Importantly, Bookend consistently assigned a higher estimated abundance to true  
334 transcripts, and false assemblies were more concentrated in the low abundance regime than for  
335 other assemblers (Fig5A). Overall precision on SIRVs averaged 55.9% for Bookend (vs. 39.6%  
336 StringTie2, 22.5% Scallop), and precision on the most abundant half of assemblies was 74.2%  
337 (vs. 48.2% StringTie2, 28.4% Scallop).

338 End-labeled reads mapping to the mouse genome were also assembled for each cell, and  
339 transcript models were compared to RefSeq mm39. All matching exon chains were considered  
340 matches, and precision was measured as the percent of all assemblies that match RefSeq. Recall  
341 was defined by tallying all transcripts correctly assembled at least once and counting the  
342 proportion of this transcript set found per cell. Although recall was considerably worse for Bookend



343 (average 7.9%) than other methods (StringTie2 16.6%, Scallop 16.5%), precision was multiple  
 344 times higher (76.3% Bookend, 29.0% StringTie2, 26.5% Scallop; FigS4B). Assemblies were  
 345 repeated for two replicates of Smart-seq2 data from the same experiment with comparable results  
 346 demonstrating that end-guided assembly is consistent across full-length sequencing protocols  
 347 (FigS4B).  
 348

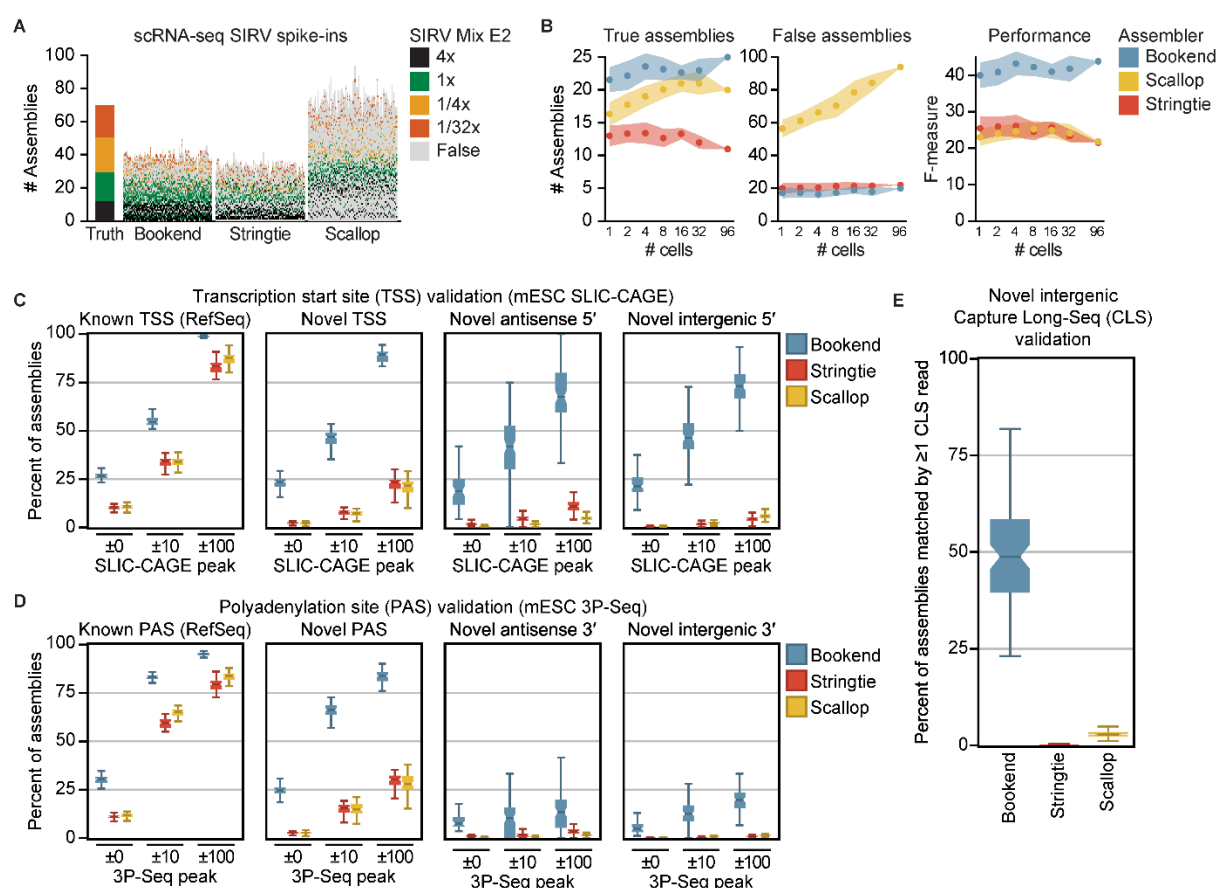

349  
 350 **Figure 4.** Bookend performance on single mouse cells  
 351 **(A)** Reconstruction of Spike-In RNA Variants (SIRVs) from 96 paired-end 100bp SMARTer libraries  
 352 of single mESCs. Each vertical bar depicts the assemblies from one cell, ordered from highest  
 353 (bottom) to lowest (top) estimated abundance. Colored boxes match a true isoform of the given  
 354 input concentration; gray boxes are false assemblies. **(B)** SIRV assembly performance as a  
 355 function of increasing sequencing depth. F1 score (right) is the harmonic mean of sensitivity and  
 356 precision. **(C)** Boxplots showing percent validation of 5' ends with SLIC-CAGE support within the  
 357 given windows for 96 single mESC assemblies. **(D)** Boxplots as in **C** showing 3' end validation by  
 358 3P-Seq peaks. **(E)** Percent of intergenic assemblies (no overlap with RefSeq) in single cells which  
 359 have ≥1 matching Capture Long-Seq read from the mouse CLS atlas.  
 360



361 As with TAIR10, RefSeq is almost certainly incomplete, and non-reference-matching  
362 assemblies could still be valid. To experimentally validate non-RefSeq mESC assemblies, three  
363 validation datasets were used: uuG-containing SLIC-CAGE<sup>17</sup> reads from mESCs for 5' end  
364 validation, mESC 3P-Seq<sup>51</sup> reads for 3' end validation, and a database of long noncoding RNAs  
365 identified by intergenic Capture Long-read Sequencing (CLS<sup>52</sup>) for full-length validation of novel  
366 intergenic loci. An assembly was considered validated by a method if at least one read directly  
367 supported an assembled transcript's respective structure(s). Assemblies with 5' ends  $\leq 100$ nt  
368 away from a RefSeq TSS contained "known" TSSs, and all others possessed "novel" TSSs.  
369 Likewise, assemblies with 3' ends  $\leq 100$ nt from their matching reference polyadenylation sites  
370 were considered "known" PASs and all others were "novel". An average of 99.7% of Bookend,  
371 83.9% of Scallop and 79.0% of Stringtie2 single-cell assemblies with a known TSS had at least  
372 one SLIC-CAGE read within 100nt (Fig4C). Moreover, the majority of novel, antisense and  
373 intergenic TSSs from Bookend transcripts were supported by at least 1 capped SLIC-CAGE read,  
374 whereas no novel group from StringTie2 or Scallop surpassed a 25% validation rate. The 3P-Seq  
375 dataset had fewer total reads and was less sensitive overall, but it still supported 19.9% of  
376 intergenic Bookend assembly 3' ends, compared to 1.4% for Scallop and 0.8% for StringTie2  
377 (Fig4D). By comparing against the CLS atlas we could validate the full structure of intergenic  
378 mESC assemblies. Bookend assembled a very small number of novel intergenic transcripts per  
379 cell (average 33 vs. 1209 by StringTie2 and 1073 by Scallop), but 49% of these were supported  
380 by one or more reads from the CLS atlas, compared to just 3% for Scallop intergenic assemblies  
381 and 0.3% for StringTie2 (Fig4E). Finally, because Cap and End Tags were extremely sparse in  
382 each cell (Supplemental Table 4), we hypothesized that the lower sensitivity could be explained  
383 by dropout of end labels. Supplying the mESC SLIC-CAGE (5') and 3P-seq (3') datasets to a  
384 Bookend hybrid assembly raised recall from 7.9% to 18.2% and retained a precision of 67.2%  
385 (FigS4B). Therefore, end-guided assembly of single-cell RNA-seq data can be used to identify  
386 genuine transcriptional novelty that is otherwise masked by noise.

387 *Condensed assembly and meta-assembly*

388 A defining feature of single-cell experiments is that many individual cells are profiled in parallel.  
389 While sensitivity in an individual cell is low, information across multiple cells can be combined to  
390 achieve a more complete view of the experiment. Tools have been developed for transcript “meta-  
391 assembly” of reads from multiple sources. By modeling for variation across samples, meta-  
392 assemblers achieve higher precision than standard assembly on the same set of reads<sup>53,54</sup>. To  
393 measure the impact of meta-assembly, a series of assemblies on subsamples of all 706 million  
394 aligned single-cell mESC reads was first performed with StringTie2 and Scallop, as well as  
395 Bookend with and without the addition of mESC SLIC-CAGE and 3P-seq libraries (Fig5A). The  
396 mean number of reference-matching transcripts varied greatly across assemblers on single cells  
397 (1,656 Bookend, 3,711 Bookend hybrid, 2,904 StringTie2, 2,831 Scallop), but the magnitude of  
398 difference decreased with progressive doublings, up to the full set of 96 cells (12,794 Bookend,  
399 13,762 Bookend hybrid, 13,524 StringTie2, 15,611 Scallop). By contrast, non-matches grew  
400 linearly with input. Bookend consistently assembled roughly an order of magnitude fewer non-  
401 matching transcripts than other assemblers across all input levels. From the full 96-cell dataset  
402 Scallop identified the most matches, but this was dwarfed by nearly 13 times the number of  
403 assemblies that failed to match RefSeq (201,631 Scallop, 100,646 StringTie2, 14,301 Bookend,  
404 15,711 Bookend hybrid). By assuming non-matches to be mostly false, we calculated recall and  
405 precision as before and combined them to track the relationship between overall performance (F-  
406 measure) and input. F-measure of Bookend and Bookend hybrid assembly continued to improve  
407 with increasing input, but Scallop and StringTie2 began to decline above 4 and 16 cells,  
408 respectively, due to the growth of non-matches outpacing matches (Fig 5B). Consistent with  
409 previous reports, we see that standard assemblers suffer from an input-dependent decay in  
410 precision<sup>53,54</sup>.

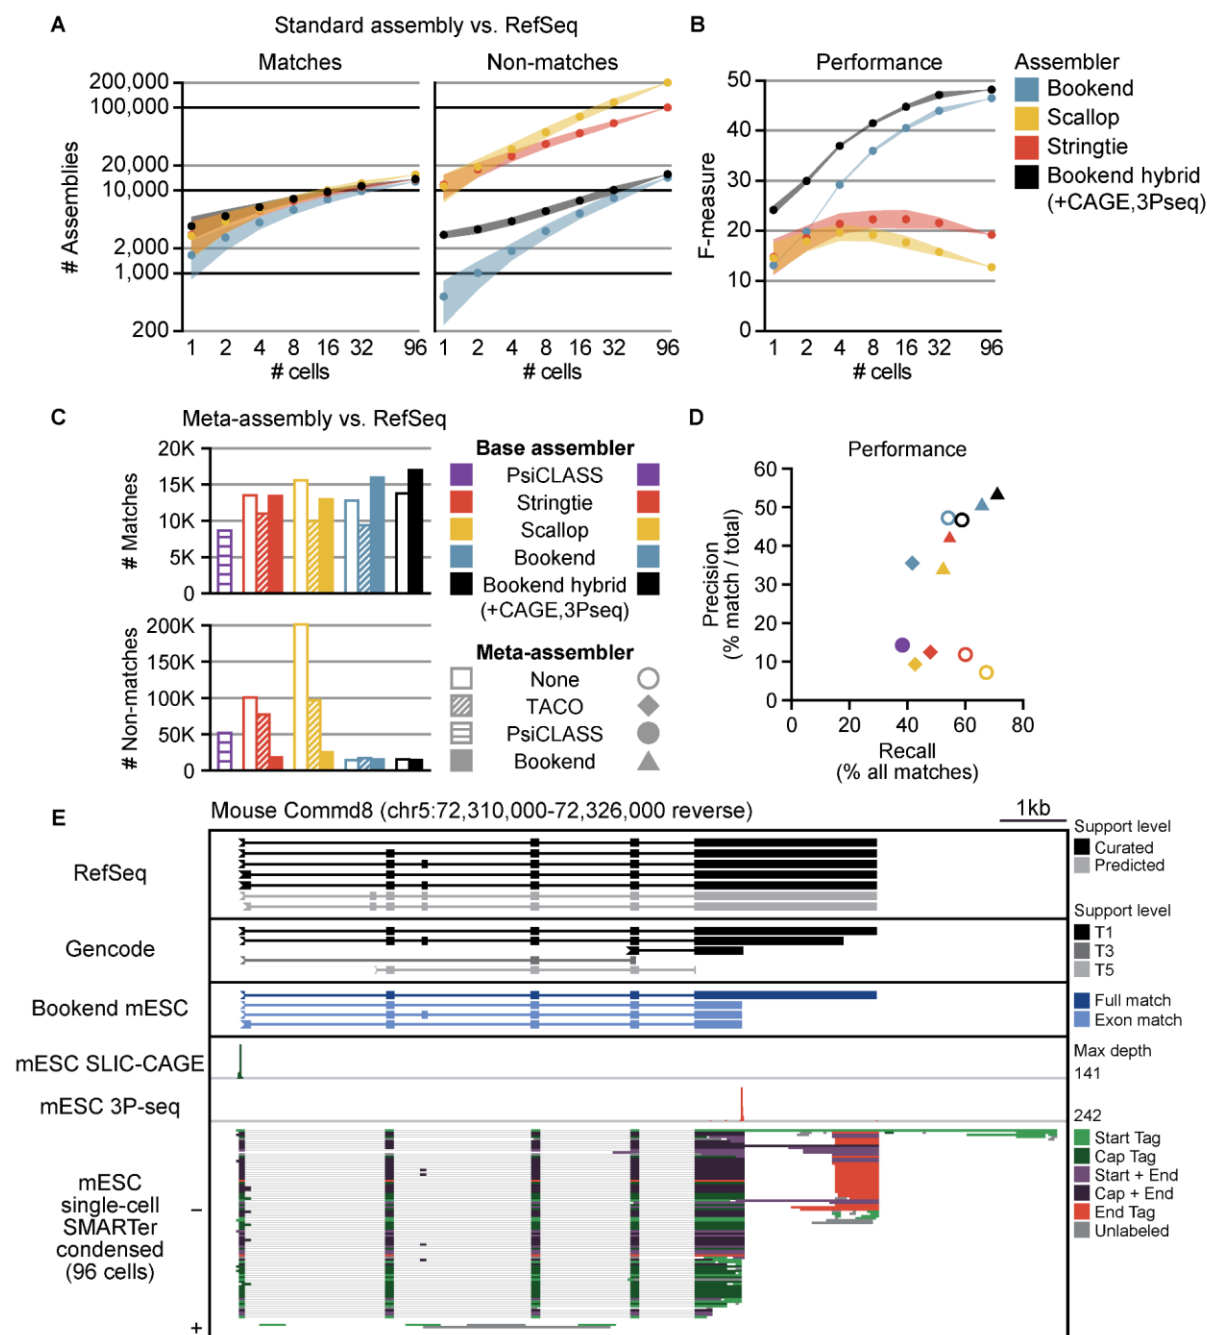

411

412 **Figure 5.** End-guided meta-assembly accurately integrates single cell data  
 413 **(A)** Performance of assemblers with input from increasing numbers of single mESC cells.  
 414 Assemblies with a matching exon chain to a RefSeq transcript (left) or no match to a RefSeq  
 415 transcript (right). **(B)** F-measure of assemblies, where recall is the proportion of all transcripts  
 416 assembled by  $\geq 1$  strategy and precision is matches/total assemblies. **(C)** Comparison of Bookend  
 417 meta-assembly to standard assembly and other meta-assemblers. Number of RefSeq-matching  
 418 transcripts assembled (top) or the number of non-matches (bottom). **(D)** Precision/recall plot of the  
 419 12 assemblies from **C**; recall and precision calculated as in **B**. **(E)** IGV browser image of the  
 420 Commd8 gene. From top to bottom: RefSeq, Gencode, and Bookend mESC annotations, 5' ends  
 421 from mESC SLIC-CAGE, 3' ends from mESC 3P-seq, Bookend-condensed partial assemblies from  
 422 96 single mESCs.

423 As an alternative approach, two published meta-assemblers were used to process the 96-cell  
424 dataset. TACO builds a consensus annotation by re-defining transcript boundaries through  
425 “change-point detection” on a set of files from any standard assembler<sup>53</sup>, whereas PsiCLASS  
426 generates the individual assemblies and performs meta-assembly through a consensus voting  
427 system<sup>54</sup>. The flexibility of Bookend’s framework allows its assembly algorithm to be run on  
428 assemblies, including its own output. To test the efficacy of meta-assembly with Bookend, each  
429 of the 96 mESC cell datasets were “condensed” by a first pass through Bookend Assemble in  
430 which no incomplete transcripts were discarded (FigS5A; see Supporting Notes: “Path Filtering”).  
431 Assembly was run again on the 96 condensed files, only retaining complete transcript models  
432 during the second pass. Bookend was also used to meta-assemble the 96 single-cell assemblies  
433 by StringTie2 and Scallop. Compared to standard assembly by StringTie2 or Scallop, all meta-  
434 assemblies produced substantially fewer non-matching transcripts (Fig5C). However, single-cell  
435 meta-assemblies surprisingly also recalled fewer RefSeq matches than standard assembly, with  
436 the exception of Bookend-to-Bookend and hybrid Bookend-to-Bookend meta-assemblies.  
437 PsiCLASS and TACO both showed somewhat higher precision than standard assembly, but at  
438 the expense of a severe drop in recall (Fig5D). PsiCLASS had the lowest recall of any method,  
439 but higher precision than StringTie2-to-TACO or Scallop-to-TACO meta-assembly. Bookend-to-  
440 Bookend meta-assembly considerably outperformed PsiCLASS in both recall (relative increase of  
441 72%) and precision (relative increase of 253%). PsiCLASS produced an unusually large number  
442 of partial transcript fragments, likely due to the fact that scRNA-seq often has substantial 3’ bias  
443 that is not adequately accounted for (FigS5A-B). Notably, when TACO was applied to single-cell  
444 Bookend assemblies, it showed both a 23% relative reduction in recall and a 25% relative  
445 reduction in precision compared to standard Bookend assembly. In contrast, Bookend-to-  
446 Bookend meta-assembly increased recall by 22% and precision by 7% (+58% recall and +42%  
447 precision vs. Bookend-to-TACO). Across all three base assemblers, TACO reported fewer full  
448 reference matches than the standard assembly, while Bookend reported the same number or

449 more full matches with a greater reduction in all non-matching classes than TACO (FigS5C). Of  
450 all combinations tested, both sensitivity and precision were highest at the intron chain and full  
451 transcript level in a Bookend-to-Bookend hybrid meta-assembly in which SLIC-CAGE and 3P-seq  
452 data were supplied alongside the single-cell condensed assemblies<sup>55</sup> (Supplemental Table S5).  
453 We report this assembly as the “Bookend mESC” annotation (Supplemental Dataset 3-4).  
454 Requiring that both transcript ends are replicable across at least two different samples raised the  
455 transcript-level concordance with RefSeq to 54.1%, a relative increase of 271% over the most  
456 precise non-Bookend method (PsiCLASS), and a substantially higher agreement than even  
457 Gencode, an alternative mouse reference annotation that only shares 31.7% of its transcripts at  
458 assembled loci with RefSeq (FigS5C). While Gencode isoforms contain a broader set of  
459 alternative TSS and PAS than RefSeq, we noticed that they can be contained in low-confidence  
460 or fragmented transcript models, as in the gene *Commd8* (Fig5E). By combining multiple unique  
461 advantages of end-guided assembly, Bookend could assemble more reference matches than any  
462 other strategy while maintaining a majority concordance with known annotations.

463

## 464 **DISCUSSION**

465 Computational gene annotation pipelines have long struggled to produce a reliable picture of plant  
466 and animal transcriptomes at the isoform level<sup>11,29,56</sup>. Studying the details of gene regulation and  
467 isoform usage remains restricted to a small number of model organisms in which manually  
468 curated accurate transcript models are available. Even with specialized methods for sequencing  
469 RNA ends, connecting those ends to a gene model can be computationally challenging, especially  
470 for noncoding RNAs<sup>35</sup>. By generating accurate end-to-end transcript assemblies from a range of  
471 widely accessible sequencing methods, Bookend enables the automated annotation of promoter  
472 architecture, alternative polyadenylation and splicing dynamics in tissues in response to  
473 developmental, environmental and disease state cues.

474           Despite rapid advancements in scale and sensitivity of single-cell RNA sequencing, the  
475 accurate detection of transcript isoforms is still an outstanding challenge<sup>48</sup>. Full-length cDNA can  
476 be amplified from single cells with the Smart-seq family of “full-length sequencing” methods,  
477 including the recently developed Smart-seq3 that more efficiently captures 5'-labeled ends and  
478 gene body reads simultaneously<sup>22,23</sup>. Multiple approaches to apply long-read sequencing to single  
479 cells have been developed, but limits on throughput, error rate, and cost restricts their use<sup>57–59</sup>.  
480 Notably, large-scale Smart-seq2 experiments across multiple organisms have already been  
481 sequenced, including tens of thousands of cells from 20 mouse tissues and 24 human tissues by  
482 the Tabula Muris and Tabula Sapiens Consortia, respectively<sup>60,61</sup>. Through meta-assembly of full-  
483 length scRNA-seq data, Bookend enables the wholesale reannotation of genomes at single-cell  
484 resolution using existing and future datasets.

485 **METHODS**

486 *PacBio Sequencing*

487 Two PacBio Iso-seq libraries were generated each using 10 µg of total RNA from Arabidopsis  
488 inflorescences containing unopened floral buds. Total RNA was extracted with TRIzol following  
489 the method described in Schon et al. 2018<sup>16</sup> to yield two biological replicates with an RNA integrity  
490 number (RIN) of 9.0 and 9.2, respectively. SMRTbell libraries were constructed by the Vienna  
491 BioCenter Core Facilities (VBCF) and sequenced on a Sequel SMRT Cell 1M.

492

493 *Published RNA sequencing data*

494 Smart-seq2 datasets from 5ng Arabidopsis thaliana floral bud RNA and tissue-matched  
495 nanoPARE libraries from 10ug total RNA were downloaded from the NCBI Gene Expression  
496 Omnibus (GEO), series accession GSE112869. Single-cell RNA-seq of mouse embryonic stem  
497 cells and SIRVs from Natarajan et al. 2019 was downloaded from EMBL-EBI ArrayExpress,  
498 accession E-MTAB-7239. SLIC-CAGE samples from 100ng mESC total RNA were downloaded  
499 from ArrayExpress, accession E-MTAB-6519. One 3P-Seq library from 75ug mESC RNA was  
500 downloaded from GEO, sample accession GSM1268958.

501

502 *Short read data processing*

503 Prior to alignment, reads were preprocessed with cutadapt<sup>62</sup> to remove sequencing adapters. End  
504 labels were identified and trimmed using the utility *bookend label*, with settings tailored to each  
505 library. For Arabidopsis single-end Smart-seq2 reads, the arguments *--strand unstranded -S*  
506 *AAGCAGTGGTATCAACGCAGAGTACGGG* *-E*  
507 *AAGCAGTGGTATCAACGCAGAGTACTTTTTTTTTTTTTTTTTTTT+ --min\_start 7 --min\_end 9 -*  
508 *-minlen 18 --minqual 25 --qualmask 16 --mismatch\_rate 0.06* were used. Paired-end mouse  
509 SMARTer reads used the same arguments except for *-S*  
510 *AAGCAGTGGTATCAACGCAGAGTACATGGG*. 5' end reads from nanoPARE libraries were







535 *Long read data processing*

536 Raw Arabidopsis PacBio reads were converted to Circular Consensus Sequences using Iso-seq3  
537 software with the command *ccs --min-passes 2 --min-rq .9*, and CCS reads were converted to  
538 full-length non-chimeric (FLNC) reads using *lima* and *isoseq3 refine --require-polya --min-rq -1 --*  
539 *min-polya-length 10*. FLNC reads were aligned to the Arabidopsis genome with the command  
540 *minimap2 -G 5000 -H -ax splice --MD -C 5 -u f -p 0.9 --junc-bed [TAIR10 transcript BED12]*.  
541 Aligned unsorted SAM files were converted to ELR with the command *bookend elr --stranded -s*  
542 *-e --start\_seq ATGGG --genome [TAIR10.fa]*.

543

544 *Assembly*

545 To make assembly setting maximally uniform across Bookend, StringTie2, Scallop, and Cufflinks,  
546 the following arguments were used. For Arabidopsis assemblies: *bookend --max\_gap 50 --*  
547 *min\_cov 2 --min\_len 60 --min\_proportion 0.02 --min\_overhang 3 --cap\_bonus 5 --cap\_filter 0.02;*  
548 *stringtie -g 50 -c 2 -m 60 -f 0.02 -a 3 -M 1 -s 5; scallop --min\_bundle\_gap 50 --*  
549 *min\_transcript\_coverage 2 --min\_transcript\_length\_base 60 --min\_flank\_length 3 --*  
550 *min\_single\_exon\_coverage 5 --min\_transcript\_length increase 50; cufflinks -F 0.02 --overhang-*  
551 *tolerance 3 --min-frags-per-transfrag 10 -j 0.15 -A 0.06*. For mouse assemblies the same settings  
552 were used with the following exceptions: *--min\_proportion* was set to 0.01, *--min\_len* to 200, and  
553 *--require\_cap* was enforced on mouse assemblies except when assembling spike-in transcripts,  
554 which do not possess caps. For meta-assembly, Bookend was run with the same settings as  
555 above for mouse. TACO was run with the arguments *--filter-min-expr 2 --filter-min-length 200 --*  
556 *isoform-frac 0.01*, and PsiCLASS was run with default settings

557

558 *Assembly algorithms*

559 A brief overview of the end-guided assembly process implemented in Bookend is below. For a full  
560 breakdown of the algorithms used, see the “Bookend Algorithms” Supplemental Note.

561 (*Generate Chunks*) First, reads are streamed in from an ELR file in sorted order and separated  
562 into overlapping chunks. (*Tag Clustering*) In each chunk, Start Tags and End Tags are clustered  
563 on each strand by grouping tags by genomic position and assigning each position a signal score  
564 of counts  $\times$  proportion of total coverage. A signal threshold is set and positions below the  
565 threshold are discarded. Remaining positions are grouped within a user-specified distance to yield  
566 Start and End clusters on each strand. (*Calculate Membership Matrix*) Start/End clusters are  
567 added to a catalog of boundaries, which include splice donor/acceptor sites that are also filtered  
568 by a threshold of total overlapping coverage. Adjacent boundary pairs define a “frag”, and each  
569 read is assigned a Membership array that describes whether the read overlaps or excludes each  
570 frag. Redundant membership arrays are combined, and the unique set of elements is stored as  
571 the Membership Matrix. (*Calculate Overlap Matrix*) A matrix describing the relationship between  
572 each element pair  $a$  and  $b$  is generated by asking (from left to right in genomic coordinates): can  
573  $a$  extend into  $b$ ? Can  $b$  extend into  $a$ ? Each comparison returns a pair of Overlaps,  $O_{ab}$  and  $O_{ba}$ ,  
574 respectively: 1 = extends, -1 = excludes, 2 = is contained by, 0 = does not overlap. The values -  
575 1 and 0 are symmetric, but 1 and 2 are directed relationships that can be used as edges in a  
576 directed graph. (*Collapse Linear Chains*) It is possible to identify and collapse non-branching sets  
577 of elements (“linear chains”) prior to assembly. Two graphs are constructed with elements as  
578 nodes: a directed graph with extensions as edges, and an undirected graph with exclusions as  
579 edges. A depth-first search is conducted by visiting each element in increasing order of  
580 information content (number of non-zero memberships). During a visit, the element’s edges are  
581 traversed recursively to record all traversed nodes’ exclusions. An element with no edges is  
582 assigned to a new chain. Otherwise, when an element’s edges are all traversed, the element is  
583 compared against its outgroup, the set of all elements reached. If all outgroup elements belong  
584 to one chain and the element and outgroup have the same set of exclusions, then the element is  
585 added to the same chain. If the element’s outgroup is assigned to multiple chains, the element  
586 begins a new chain. After completion of the search, each chain is combined to form a single

587 reduced element. (*Generate Overlap Graph*) From the set of reduced elements a second directed  
588 graph is constructed with a global source (Start+/End-) and sink (Start-/End+), where each node  
589 records the element weight (sequenced bases / genomic length), outgroup (extends to), ingroup  
590 (extends from), containments and exclusions. (*Resolve Containment*) All elements contained by  
591 one or more longer elements have their weight redistributed proportionally to their container as  
592 long as not all containers exclude any single node the element doesn't already exclude. (*Greedy*  
593 *Paths*) All elements begin unassigned. Starting with the heaviest unassigned element, choose an  
594 extension (ingroup/outgroup pair) that maximizes a score that equally combines the following:  
595 maximal weight of the extension, maximal similarity of weight distribution across samples between  
596 element and extension, minimal coverage variance across covered frags, and does not cause the  
597 source or sink to become unreachable. The highest-scoring extension is iteratively added to a  
598 path until both source and sink are reached. Paths are generated in this manner until the total  
599 weight of unassigned elements falls below a given signal threshold.

600

## 601 **Contributions**

602 M.A.S. and M.D.N. conceived the project; M.A.S. developed the methodology; M.A.S and S.L.  
603 performed the experiments; M.A.S. and F.H. analyzed data; M.A.S. prepared figures; M.A.S wrote  
604 the article; M.A.S. and M.D.N. edited the article; M.D.N. acquired funding and supervised the  
605 project.

606

## 607 **Acknowledgements**

608 We thank the Next Generation Sequencing Facility at Vienna BioCenter Core Facilities GmbH  
609 (VBCF) for their outstanding services and technical support.

610

## 611 **Competing interests**

612 The authors declare that they have no conflicts of interests.

613 **Funding**

614 This work was supported by funding from the European Research Council under the European  
615 Union's Horizon 2020 research and innovation program (Grant 637888 to M.D.N.) and the DK  
616 Graduate Program in RNA Biology (DK-RNA) sponsored by the Austria Science Fund (FWF, DK  
617 W 1207-B09).

618

619 **Data access**

620 Bookend software is available on the Python Package Index and can be installed with the  
621 command *pip install bookend-rna*. Source code is available as a repository on GitHub at  
622 <https://github.com/Gregor-Mendel-Institute/bookend>. All sequencing data generated in this study  
623 have been submitted to the National Center for Biotechnology Information Gene Expression  
624 Omnibus (NCBI GEO, <https://www.ncbi.nlm.nih.gov/geo/>) under accession number GSE189482.

## 625 REFERENCES

- 626 1. Liu, F., Marquardt, S., Lister, C., Swiezewski, S. & Dean, C. Targeted 3' processing of  
627 antisense transcripts triggers Arabidopsis FLC chromatin silencing. *Science* **327**, 94–97  
628 (2010).
- 629 2. Rhinn, H. *et al.* Alternative  $\alpha$ -synuclein transcript usage as a convergent mechanism in  
630 Parkinson's disease pathology. *Nat. Commun.* **3**, 1084 (2012).
- 631 3. Solana, J. *et al.* Conserved functional antagonism of CELF and MBNL proteins controls  
632 stem cell-specific alternative splicing in planarians. *Elife* **5**, (2016).
- 633 4. Mudge, J. M. & Harrow, J. The state of play in higher eukaryote gene annotation. *Nat. Rev.*  
634 *Genet.* **17**, 758–772 (2016).
- 635 5. Frankish, A. *et al.* GENCODE reference annotation for the human and mouse genomes.  
636 *Nucleic Acids Res.* **47**, D766–D773 (2019).
- 637 6. McGarvey, K. M. *et al.* Mouse genome annotation by the RefSeq project. *Mamm. Genome*  
638 **26**, 379–390 (2015).
- 639 7. Berardini, T. Z. *et al.* The Arabidopsis information resource: Making and mining the 'gold  
640 standard' annotated reference plant genome. *Genesis* **53**, 474–485 (2015).
- 641 8. FANTOM Consortium and the RIKEN PMI and CLST (DGT) *et al.* A promoter-level  
642 mammalian expression atlas. *Nature* **507**, 462–470 (2014).
- 643 9. Wu, P.-Y., Phan, J. H. & Wang, M. D. Assessing the impact of human genome annotation  
644 choice on RNA-seq expression estimates. *BMC Bioinformatics* **14 Suppl 11**, S8 (2013).
- 645 10. SEQC/MAQC-III Consortium. A comprehensive assessment of RNA-seq accuracy,  
646 reproducibility and information content by the Sequencing Quality Control Consortium. *Nat.*  
647 *Biotechnol.* **32**, 903–914 (2014).
- 648 11. Guigó, R. *et al.* EGASP: the human ENCODE Genome Annotation Assessment Project.  
649 *Genome Biol.* **7 Suppl 1**, S2.1–31 (2006).
- 650 12. Stark, R., Grzelak, M. & Hadfield, J. RNA sequencing: the teenage years. *Nat. Rev. Genet.*  
651 **20**, 631–656 (2019).
- 652 13. Levin, J. Z. *et al.* Comprehensive comparative analysis of strand-specific RNA sequencing  
653 methods. *Nat. Methods* **7**, 709–715 (2010).
- 654 14. Murata, M. *et al.* Detecting expressed genes using CAGE. *Methods Mol. Biol.* **1164**, 67–85  
655 (2014).
- 656 15. Adiconis, X. *et al.* Comprehensive comparative analysis of 5'-end RNA-sequencing  
657 methods. *Nat. Methods* **15**, 505–511 (2018).
- 658 16. Schon, M. A., Kellner, M. J. & Plotnikova, A. NanoPARE: parallel analysis of RNA 5' ends  
659 from low-input RNA. *Genome Res.* (2018).
- 660 17. Cvetesic, N. *et al.* SLIC-CAGE: high-resolution transcription start site mapping using  
661 nanogram-levels of total RNA. *Genome Res.* **28**, 1943–1956 (2018).
- 662 18. Jan, C. H., Friedman, R. C., Ruby, J. G. & Bartel, D. P. Formation, regulation and evolution  
663 of *Caenorhabditis elegans* 3'UTRs. *Nature* **469**, 97–101 (2011).
- 664 19. Moll, P., Ante, M., Seitz, A. & Reda, T. QuantSeq 3' mRNA sequencing for RNA  
665 quantification. *Nat. Methods* **11**, i–iii (2014).
- 666 20. Pelechano, V., Wei, W. & Steinmetz, L. M. Extensive transcriptional heterogeneity revealed  
667 by isoform profiling. *Nature* **497**, 127–131 (2013).
- 668 21. Wang, J. *et al.* TIF-Seq2 disentangles overlapping isoforms in complex human  
669 transcriptomes. *Nucleic Acids Res.* **48**, e104 (2020).
- 670 22. Picelli, S. *et al.* Smart-seq2 for sensitive full-length transcriptome profiling in single cells.  
671 *Nat. Methods* **10**, 1096–1098 (2013).
- 672 23. Hagemann-Jensen, M. *et al.* Single-cell RNA counting at allele and isoform resolution using  
673 Smart-seq3. *Nat. Biotechnol.* **38**, 708–714 (2020).
- 674 24. Cao, J. *et al.* The single-cell transcriptional landscape of mammalian organogenesis.

- 675 *Nature* **566**, 496–502 (2019).
- 676 25. Cao, J. *et al.* Comprehensive single-cell transcriptional profiling of a multicellular organism.  
677 *Science* **357**, 661–667 (2017).
- 678 26. Zheng, G. X. Y. *et al.* Massively parallel digital transcriptional profiling of single cells. *Nat.*  
679 *Commun.* **8**, 14049 (2017).
- 680 27. Garalde, D. R. *et al.* Highly parallel direct RNA sequencing on an array of nanopores. *Nat.*  
681 *Methods* **15**, 201–206 (2018).
- 682 28. Wan, Y. *et al.* Systematic identification of intergenic long-noncoding RNAs in mouse retinas  
683 using full-length isoform sequencing. *BMC Genomics* **20**, 559 (2019).
- 684 29. Steijger, T. *et al.* Assessment of transcript reconstruction methods for RNA-seq. *Nat.*  
685 *Methods* **10**, 1177–1184 (2013).
- 686 30. Tardaguila, M. *et al.* SQANTI: extensive characterization of long-read transcript sequences  
687 for quality control in full-length transcriptome identification and quantification. *Genome Res.*  
688 (2018) doi:10.1101/gr.222976.117.
- 689 31. Kuo, R. I. *et al.* Normalized long read RNA sequencing in chicken reveals transcriptome  
690 complexity similar to human. *BMC Genomics* **18**, 323 (2017).
- 691 32. Tang, A. D. *et al.* Full-length transcript characterization of SF3B1 mutation in chronic  
692 lymphocytic leukemia reveals downregulation of retained introns. *Nat. Commun.* **11**, 1438  
693 (2020).
- 694 33. Kovaka, S. *et al.* Transcriptome assembly from long-read RNA-seq alignments with  
695 StringTie2. *Genome Biol.* **20**, 278 (2019).
- 696 34. Cumbie, J. S., Ivanchenko, M. G. & Megraw, M. NanoCAGE-XL and CapFilter: an  
697 approach to genome wide identification of high confidence transcription start sites. *BMC*  
698 *Genomics* **16**, 597 (2015).
- 699 35. de Rie, D. *et al.* An integrated expression atlas of miRNAs and their promoters in human  
700 and mouse. *Nat. Biotechnol.* **35**, 872–878 (2017).
- 701 36. Thieffry, A. *et al.* Characterization of *Arabidopsis thaliana* Promoter Bidirectionality and  
702 Antisense RNAs by Inactivation of Nuclear RNA Decay Pathways. *Plant Cell* **32**, 1845–  
703 1867 (2020).
- 704 37. Sherstnev, A. *et al.* Direct sequencing of *Arabidopsis thaliana* RNA reveals patterns of  
705 cleavage and polyadenylation. *Nat. Struct. Mol. Biol.* **19**, 845–852 (2012).
- 706 38. Perteza, M. *et al.* StringTie enables improved reconstruction of a transcriptome from RNA-  
707 seq reads. *Nat. Biotechnol.* **33**, 290–295 (2015).
- 708 39. Shao, M. & Kingsford, C. Accurate assembly of transcripts through phase-preserving graph  
709 decomposition. *Nat. Biotechnol.* **35**, 1167–1169 (2017).
- 710 40. Trapnell, C. *et al.* Differential gene and transcript expression analysis of RNA-seq  
711 experiments with TopHat and Cufflinks. *Nat. Protoc.* **7**, 562–578 (2012).
- 712 41. Amarasinghe, S. L. *et al.* Opportunities and challenges in long-read sequencing data  
713 analysis. *Genome Biol.* **21**, 30 (2020).
- 714 42. Goodwin, S., McPherson, J. D. & McCombie, W. R. Coming of age: ten years of next-  
715 generation sequencing technologies. *Nat. Rev. Genet.* **17**, 333–351 (2016).
- 716 43. Balázs, Z. *et al.* Template-switching artifacts resemble alternative polyadenylation. *BMC*  
717 *Genomics* **20**, 824 (2019).
- 718 44. Tang, D. T. P. *et al.* Suppression of artifacts and barcode bias in high-throughput  
719 transcriptome analyses utilizing template switching. *Nucleic Acids Res.* **41**, e44 (2013).
- 720 45. Gordon, S. P. *et al.* Widespread Polycistronic Transcripts in Fungi Revealed by Single-  
721 Molecule mRNA Sequencing. *PLoS One* **10**, e0132628 (2015).
- 722 46. Xie, Z., Kasschau, K. D. & Carrington, J. C. Negative Feedback Regulation of Dicer-Like1  
723 in *Arabidopsis* by microRNA-Guided mRNA Degradation. *Current Biology* vol. 13 784–789  
724 (2003).
- 725 47. Rajagopalan, R., Vaucheret, H., Trejo, J. & Bartel, D. P. A diverse and evolutionarily fluid



- 726 set of microRNAs in *Arabidopsis thaliana*. *Genes Dev.* **20**, 3407–3425 (2006).
- 727 48. Westoby, J., Artemov, P., Hemberg, M. & Ferguson-Smith, A. Obstacles to detecting  
728 isoforms using full-length scRNA-seq data. *Genome Biol.* **21**, 74 (2020).
- 729 49. Natarajan, K. N. *et al.* Comparative analysis of sequencing technologies for single-cell  
730 transcriptomics. *Genome Biol.* **20**, 70 (2019).
- 731 50. Paul, L. *et al.* SIRVs: Spike-In RNA Variants as External Isoform Controls in RNA-  
732 Sequencing. *bioRxiv* 080747 (2016) doi:10.1101/080747.
- 733 51. Nam, J.-W. *et al.* Global analyses of the effect of different cellular contexts on microRNA  
734 targeting. *Mol. Cell* **53**, 1031–1043 (2014).
- 735 52. Lagarde, J. *et al.* High-throughput annotation of full-length long noncoding RNAs with  
736 capture long-read sequencing. *Nat. Genet.* **49**, 1731–1740 (2017).
- 737 53. Niknafs, Y. S., Pandian, B., Iyer, H. K., Chinnaiyan, A. M. & Iyer, M. K. TACO produces  
738 robust multisample transcriptome assemblies from RNA-seq. *Nat. Methods* **14**, 68–70  
739 (2017).
- 740 54. Song, L., Sabunciyan, S., Yang, G. & Florea, L. A multi-sample approach increases the  
741 accuracy of transcript assembly. *Nat. Commun.* **10**, 5000 (2019).
- 742 55. Pertea, G. & Pertea, M. GFF Utilities: GffRead and GffCompare. *F1000Res.* **9**, 304 (2020).
- 743 56. Wang, B. *et al.* Unveiling the complexity of the maize transcriptome by single-molecule  
744 long-read sequencing. *Nat. Commun.* **7**, 11708 (2016).
- 745 57. Gupta, I. *et al.* Single-cell isoform RNA sequencing characterizes isoforms in thousands of  
746 cerebellar cells. *Nat. Biotechnol.* (2018) doi:10.1038/nbt.4259.
- 747 58. Philpott, M. *et al.* Nanopore sequencing of single-cell transcriptomes with scCOLOR-seq.  
748 *Nat. Biotechnol.* (2021) doi:10.1038/s41587-021-00965-w.
- 749 59. Zheng, Y. F., Chen, Z. C., Shi, Z. X., Hu, K. H. & Zhong, J. Y. HIT-sclSOseq: High-  
750 throughput and high-accuracy single-cell full-length isoform sequencing for corneal  
751 epithelium. *bioRxiv* (2020).
- 752 60. Tabula Muris Consortium *et al.* Single-cell transcriptomics of 20 mouse organs creates a  
753 Tabula Muris. *Nature* **562**, 367–372 (2018).
- 754 61. Quake, S. R. & Sapiens Consortium, T. The Tabula Sapiens: a single cell transcriptomic  
755 atlas of multiple organs from individual human donors. *bioRxiv* (2021).
- 756 62. Martin, M. Cutadapt removes adapter sequences from high-throughput sequencing reads.  
757 *EMBnet.journal* **17**, 10–12 (2011).
- 758 63. Dobin, A. *et al.* STAR: ultrafast universal RNA-seq aligner. *Bioinformatics* **29**, 15–21 (2013).
